# Supplementary material
Source: publisher figshare collection journal article supplement (https://acs.figshare.com/ndownloader/files/25871626)
Supplement: Supplementary file 1 [file 25871626]

# **Electronic Transport Properties of Nb<sub>1-x</sub>Ta<sub>x</sub>Sb<sub>2</sub> Single-Crystal Semimetals Grown By Chemical Vapor Transport Based High-Throughput Method**

Lei Guo,<sup>†,§</sup> Meng Xu,<sup>‡</sup> Lei Chen,<sup>||</sup> Xin Huang,<sup>⊥</sup> Xin-Yao Shi,<sup>&</sup> Jing-Shi Ying,<sup>#</sup> Tao Zhang,<sup>◇</sup>  
Weiyao Zhao,<sup>\*</sup>,<sup>||</sup> Shuai Dong,<sup>\*,†</sup> and Ren-Kui Zheng<sup>\*,§,#</sup>

<sup>†</sup>School of Physics, Southeast University, Nanjing 211189, China

<sup>‡</sup>College of Science, Hohai University, Nanjing 210098, China

<sup>§</sup>State Key Laboratory of High Performance Ceramics and Superfine Microstructure, Shanghai Institute of Ceramics, Chinese Academy of Sciences, Shanghai 200050, China

<sup>||</sup>Institute for Superconducting & Electronic Materials, Innovation Campus, University of Wollongong, Wollongong, NSW 2500, Australia

<sup>⊥</sup>School of Science, Nanjing University of Posts and Telecommunications, Nanjing 210023, China

<sup>&</sup>Suzhou Institute of Nano-Tech and Nano-Bionics, Chinese Academy of Sciences, Suzhou 215123, China

<sup>#</sup>School of Materials Science and Engineering, Jiangxi Engineering Laboratory for Advanced Functional Thin Films, Nanchang University, Nanchang 330031, China

<sup>◇</sup>School of Physics and Materials Science, Guangzhou University, Guangzhou 510006, China

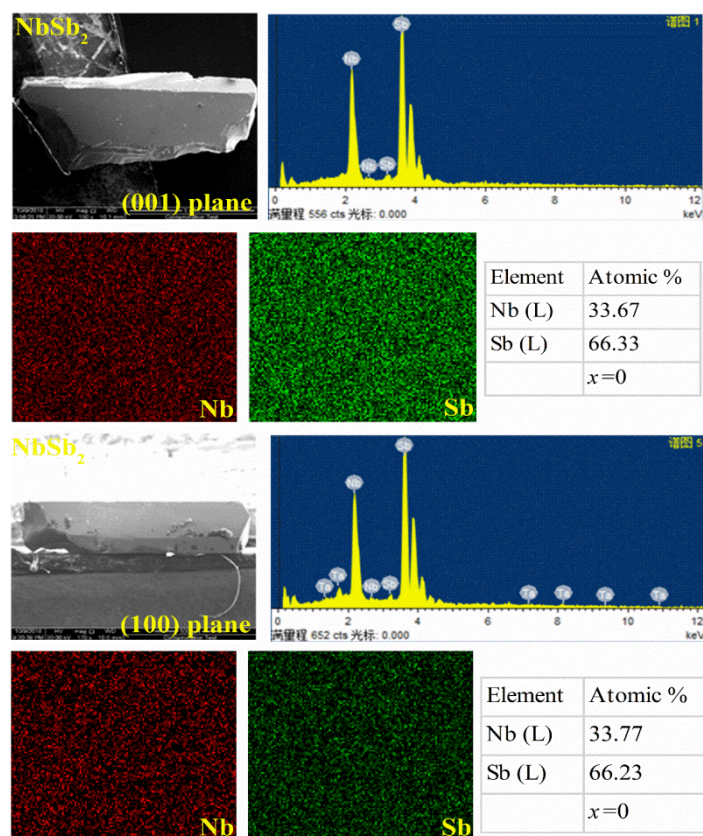

**Figure S1** SEM and element mapping pictures of Ta-0 single crystal.

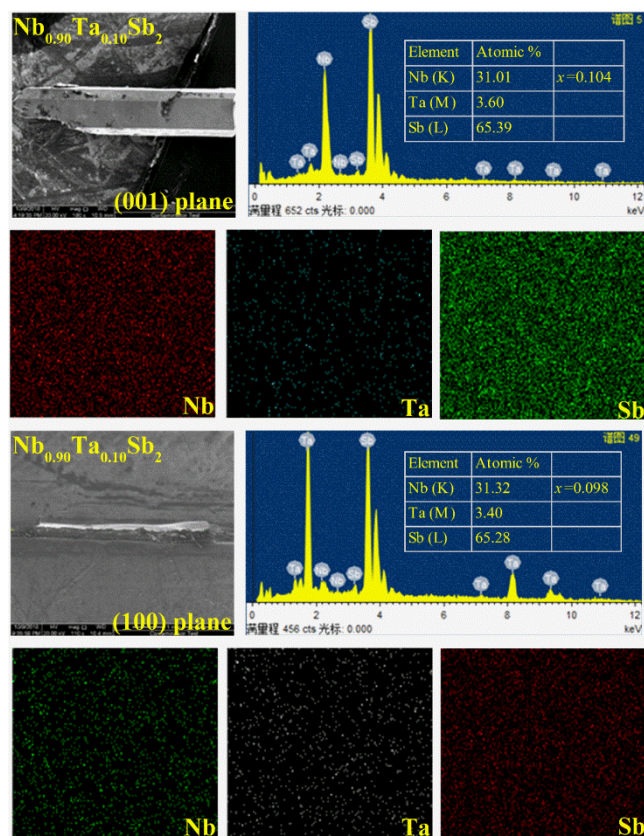

**Figure S2** SEM and element mapping pictures of Ta-0.1 single crystal.

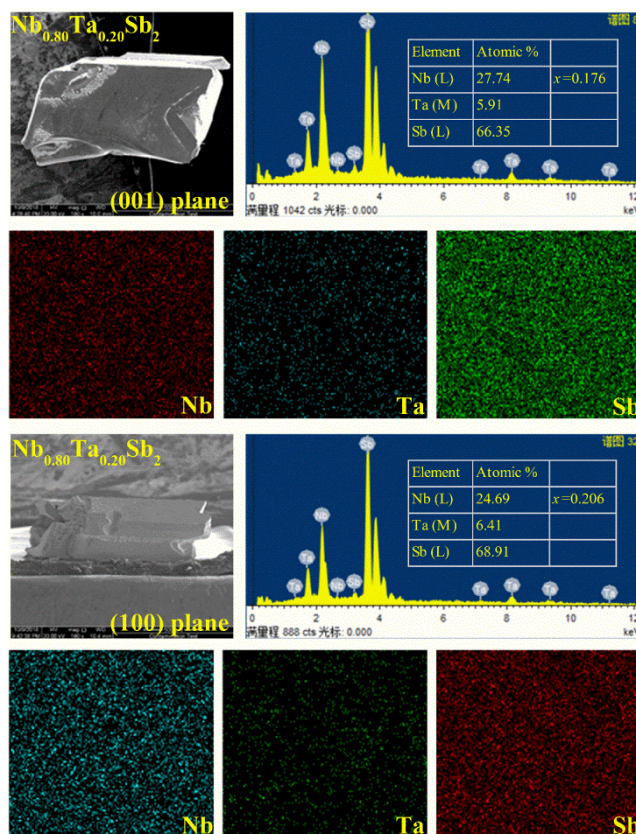

**Figure S3** SEM and element mapping pictures of Ta-0.2 single crystal.

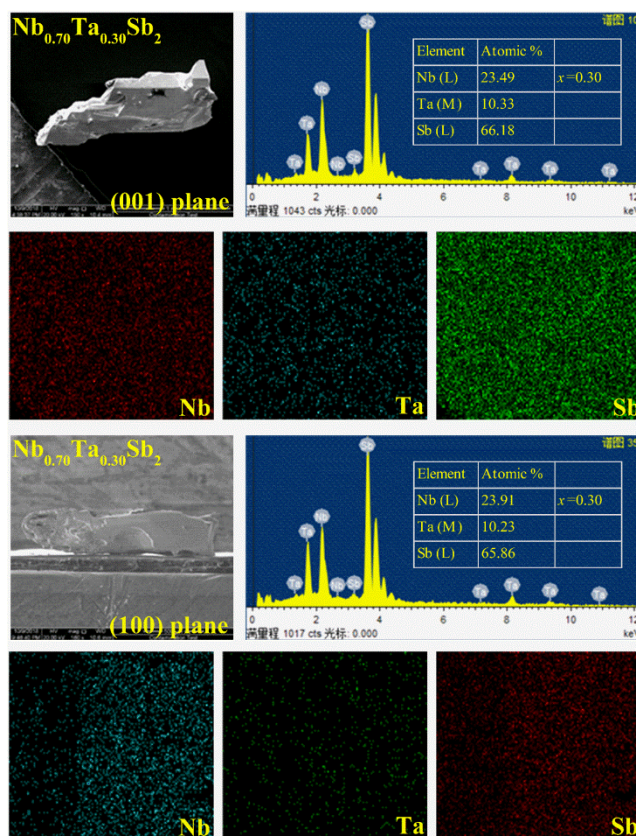

**Figure S4** SEM and element mapping pictures of Ta-0.3 single crystal.



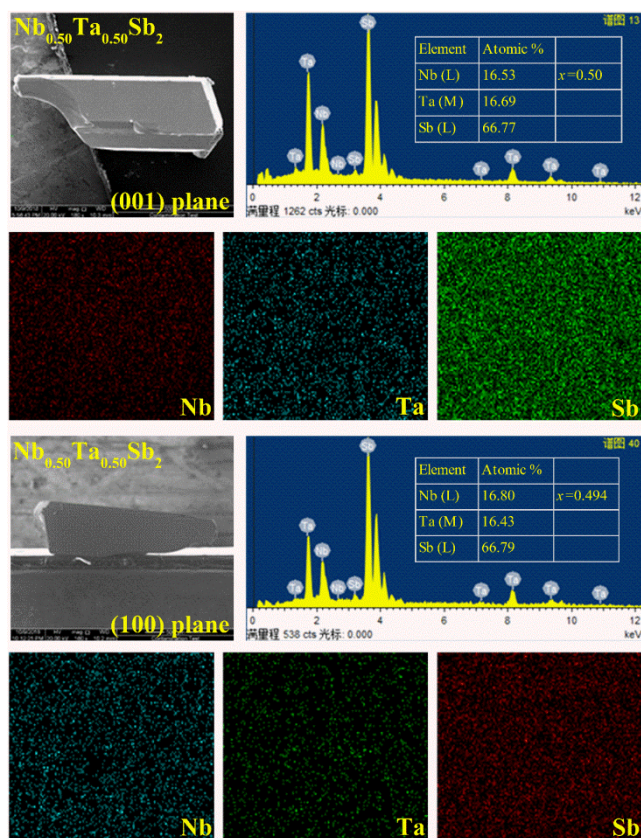

**Figure S5** SEM and element mapping pictures of Ta-0.5 single crystal.

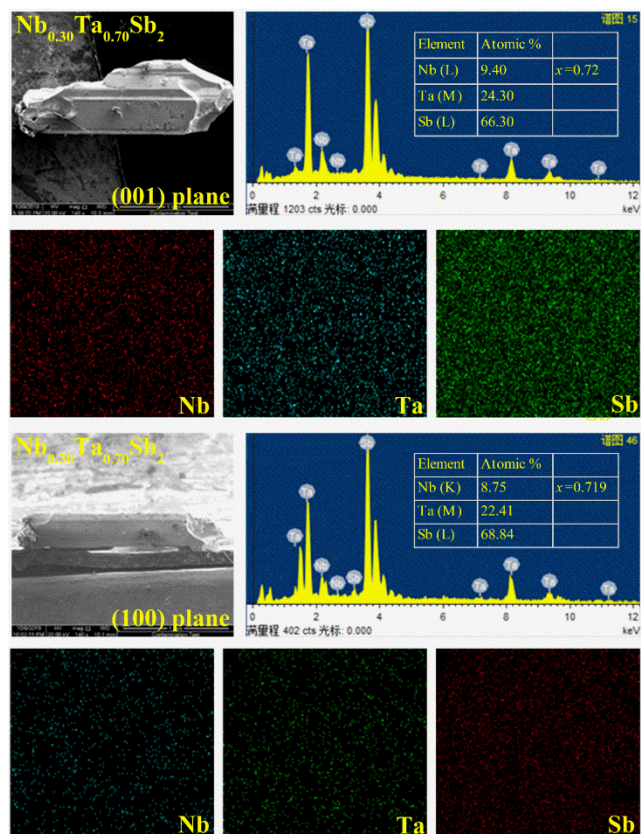

**Figure S6** SEM and element mapping pictures of Ta-0.7 single crystal.

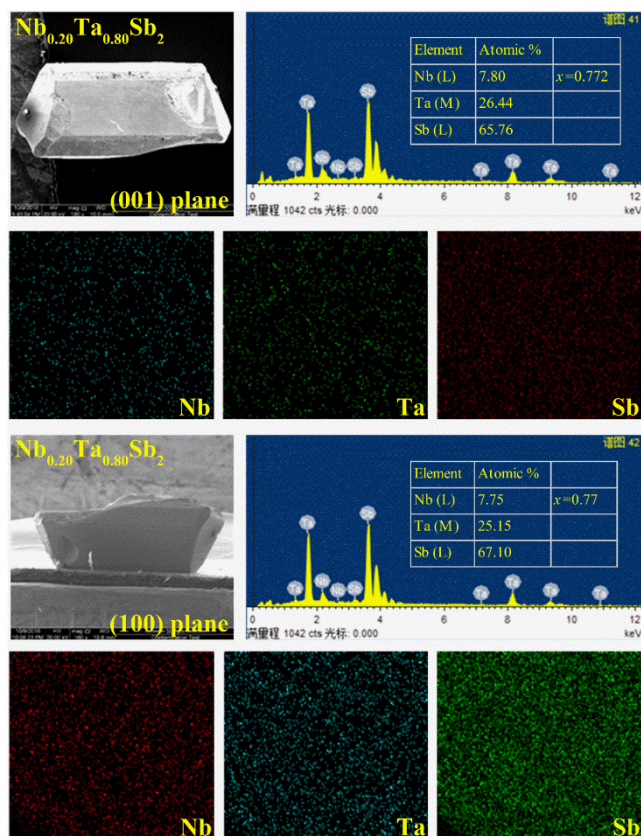

**Figure S7** SEM and element mapping pictures of Ta-0.8 single crystal.

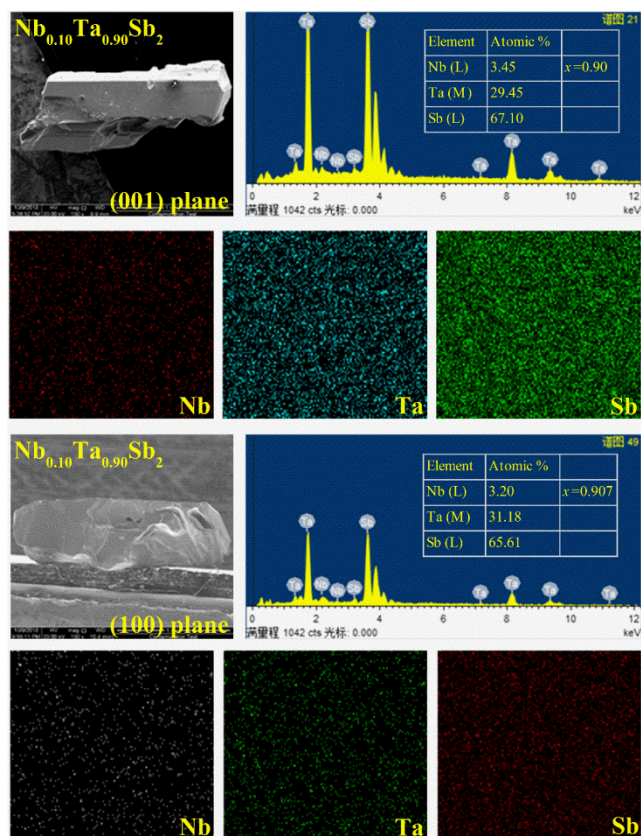

**Figure S8** SEM and element mapping pictures of Ta-0.9 single crystal.



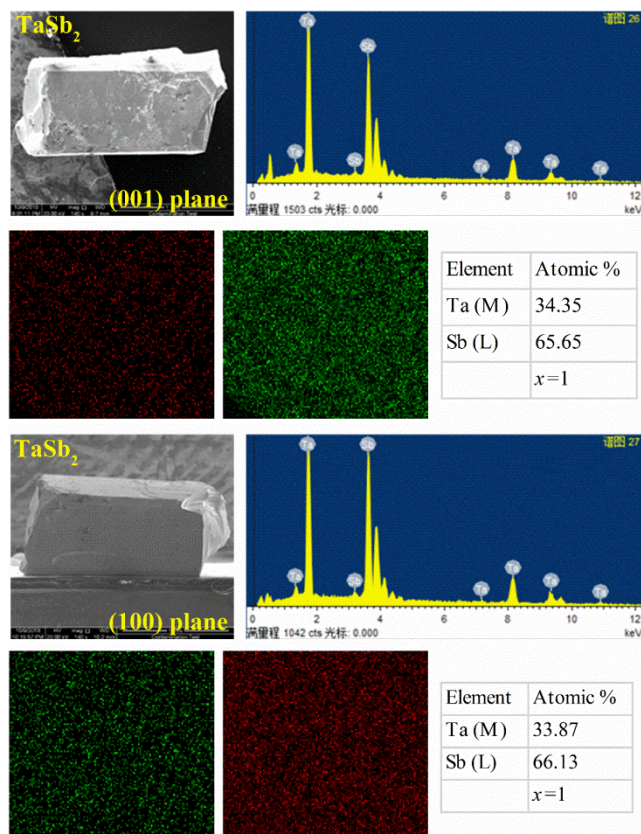

**Figure S9** SEM and element mapping pictures of Ta-1.0 single crystal.

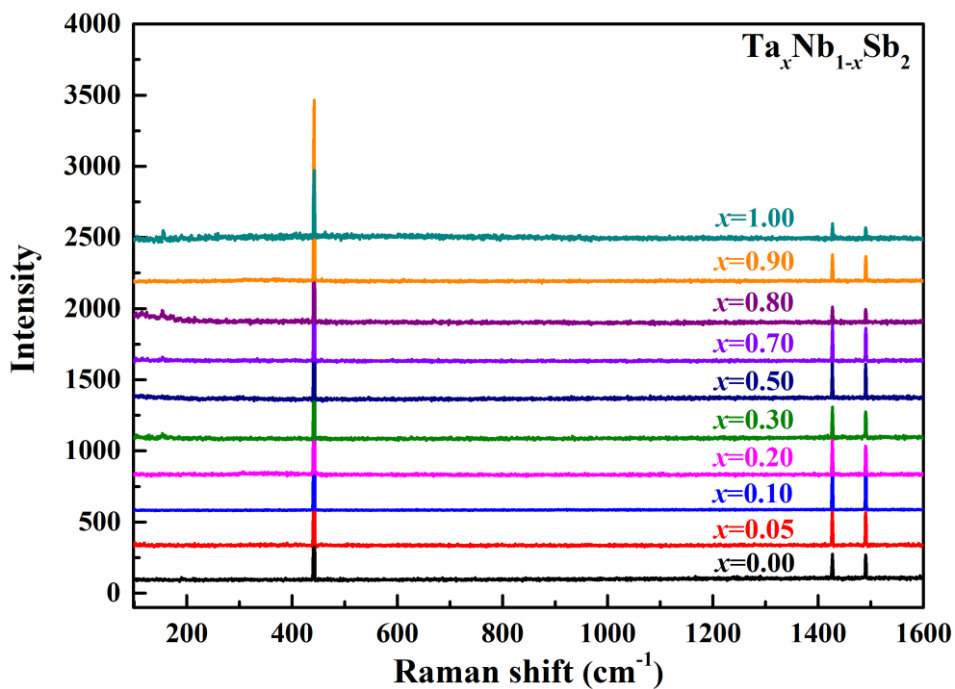

**Figure S10** Raman spectra of  $\text{Nb}_x\text{Ta}_{1-x}\text{Sb}_2$  single crystals, the peak positions of the vibrational modes are locked at 442, 1427, 1490  $\text{cm}^{-1}$ , respectively.

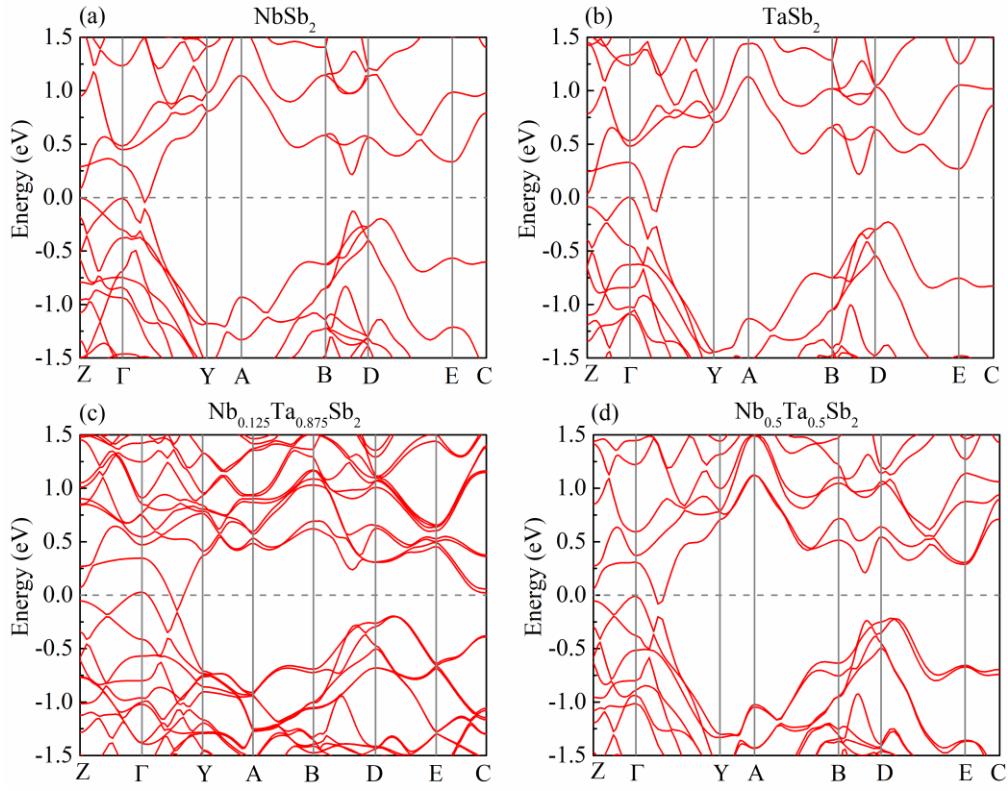

**Figure S11** Band structures of NTS systems.

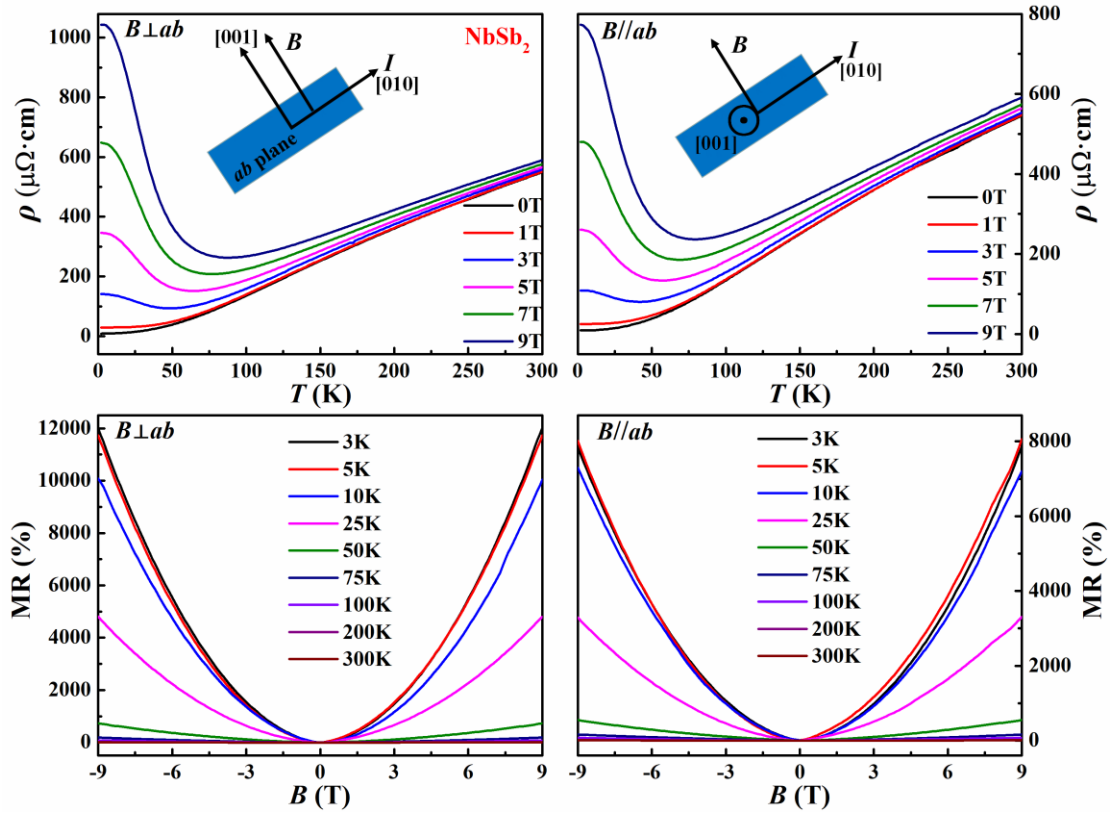

**Figure S12** Transport and magnetoresistance curves of Ta-0 single crystal.

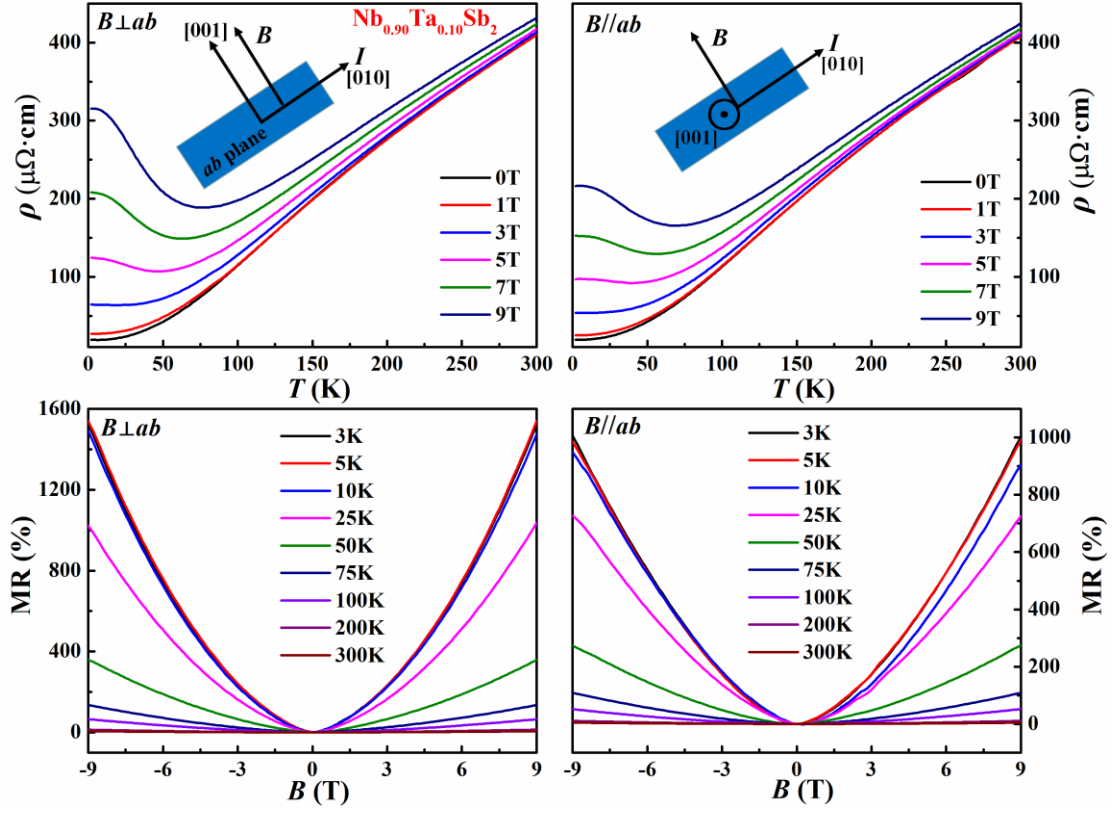

**Figure S13** Transport and magnetoresistance curves of Ta-0.1 single crystal.

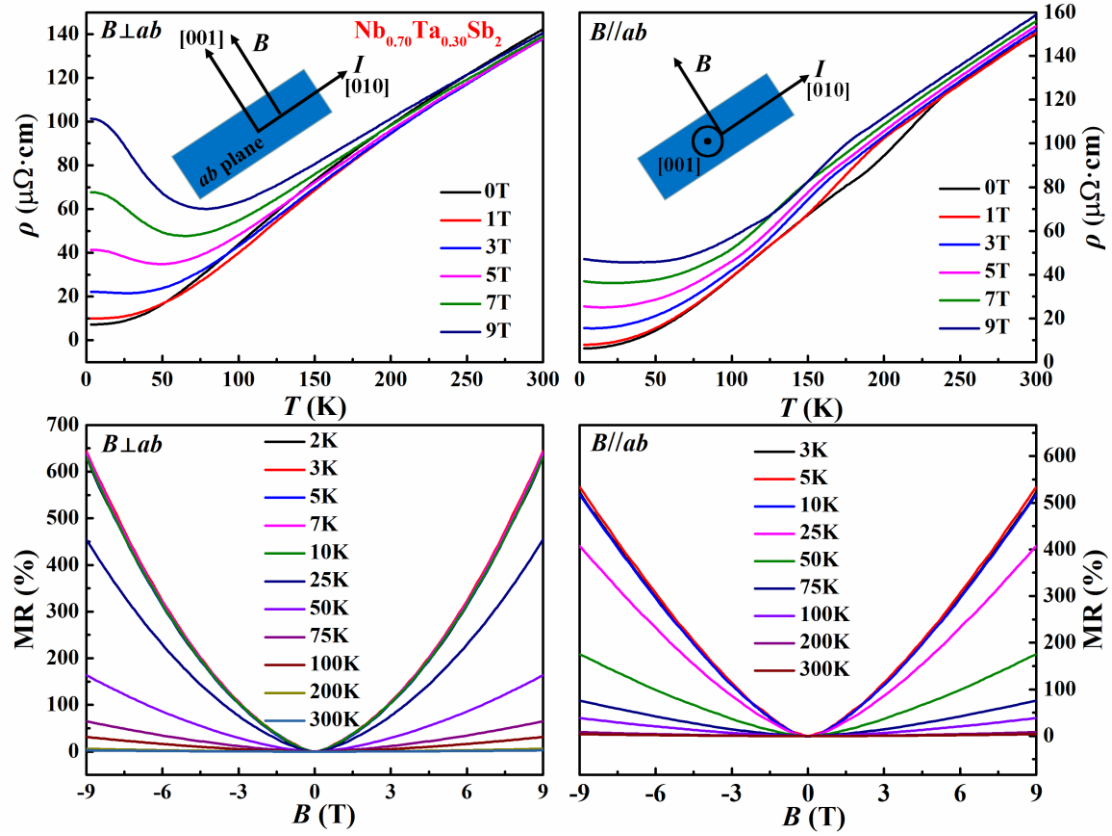

**Figure S14** Transport and magnetoresistance curves of Ta-0.3 single crystal.



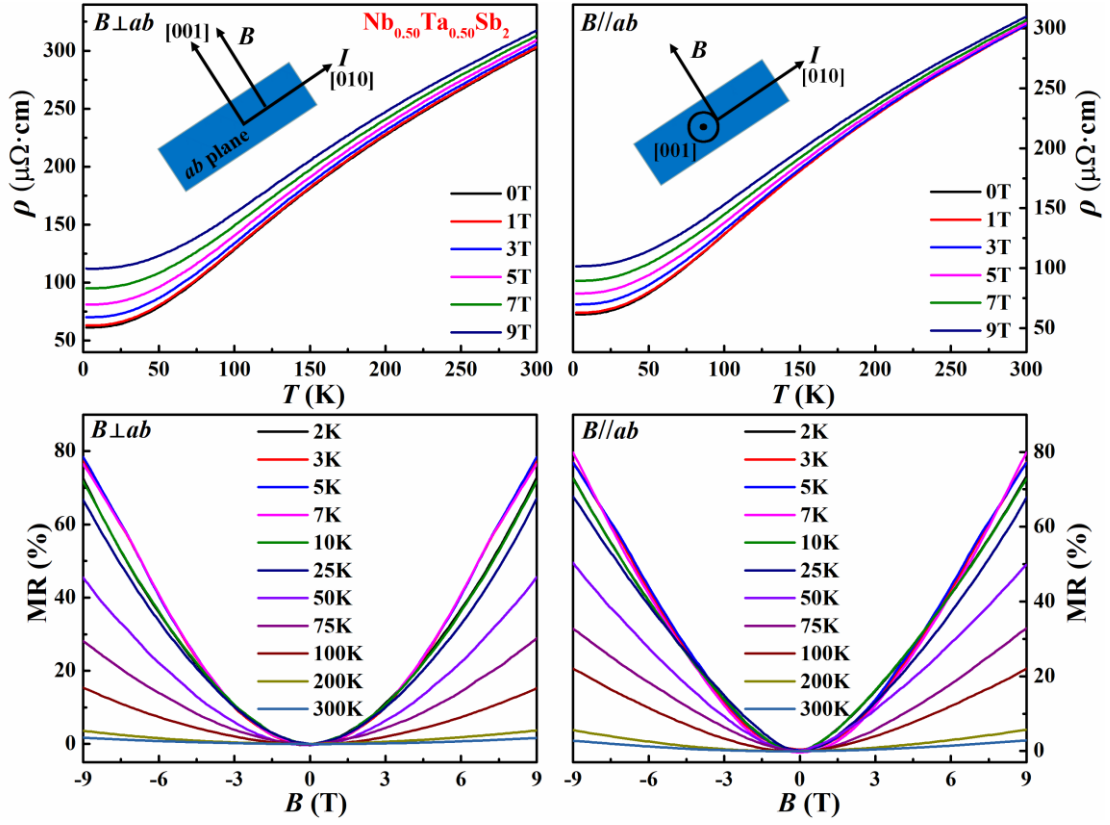

**Figure S15** Transport and magnetoresistance curves of Ta-0.5 single crystal.

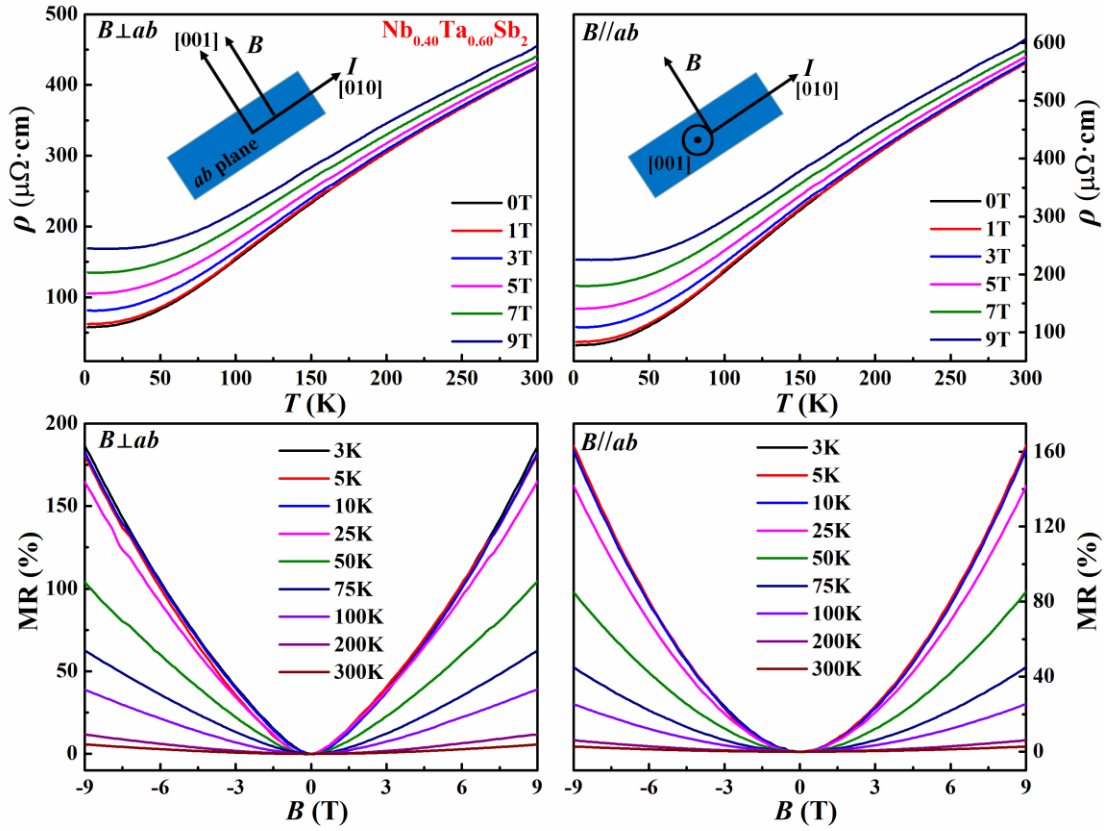

**Figure S16** Transport and magnetoresistance curves of Ta-0.6 single crystal.

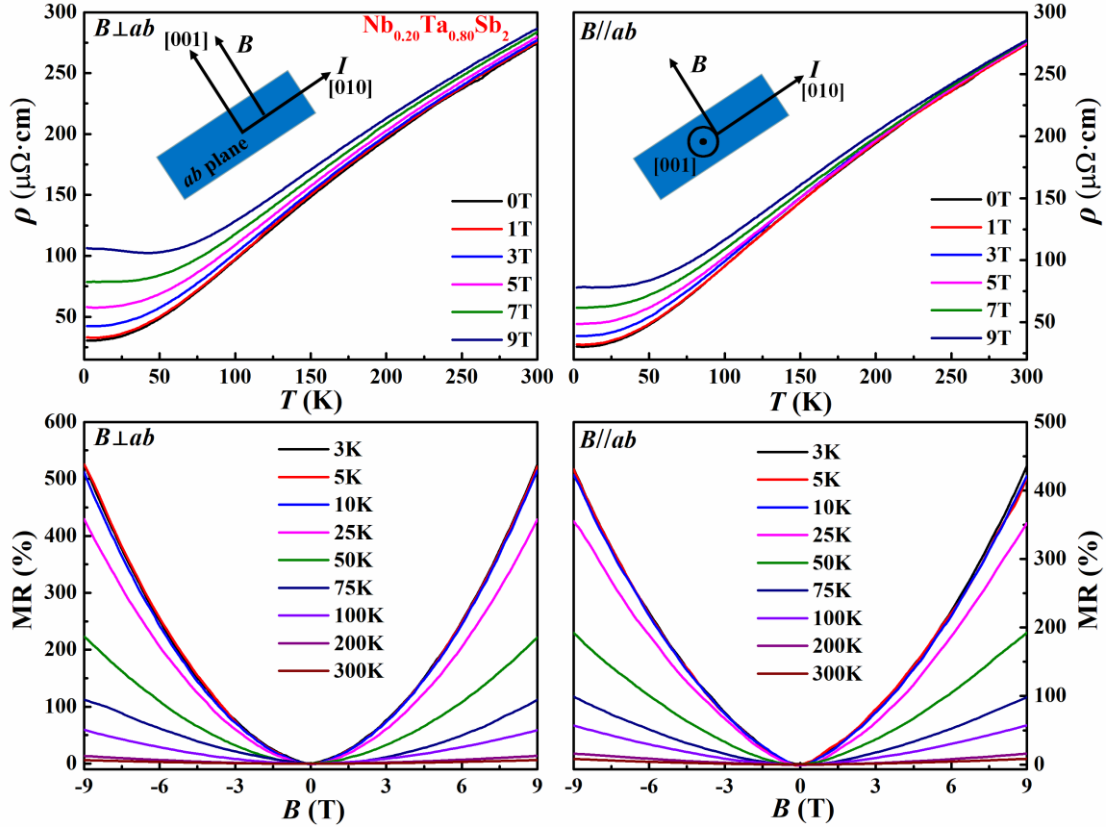

**Figure S17** Transport and magnetoresistance curves of Ta-0.8 single crystal.

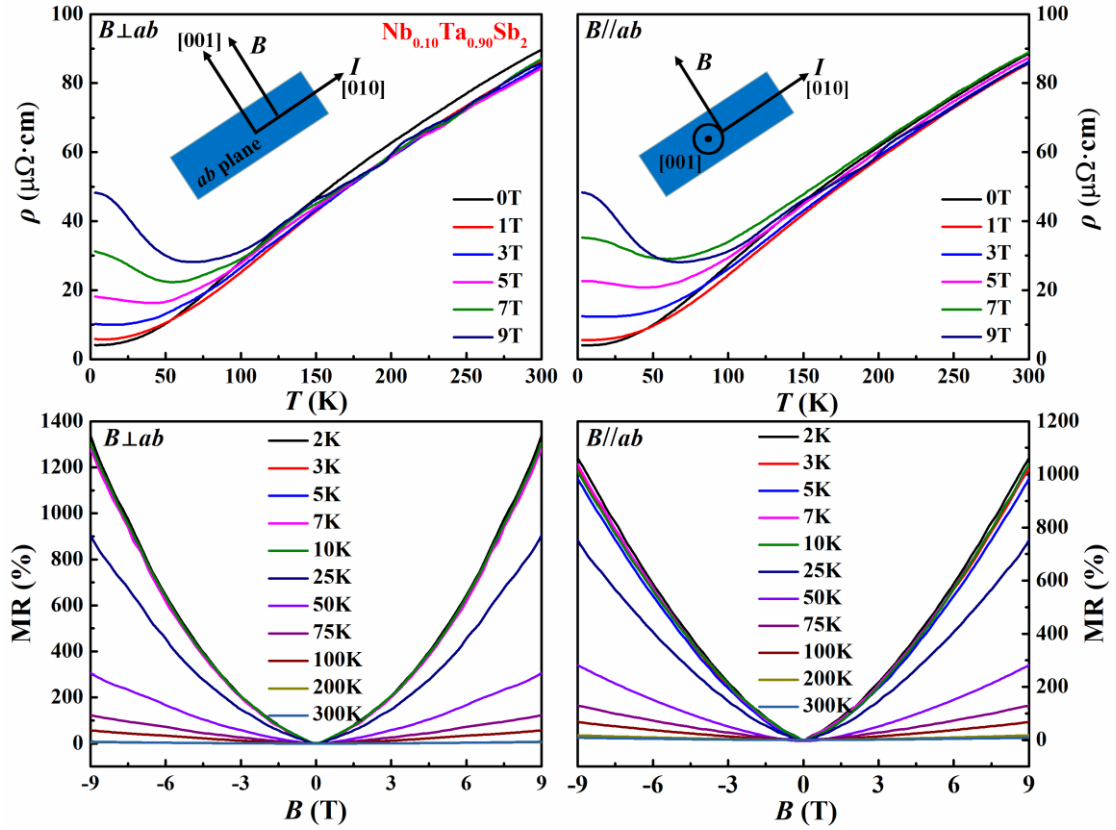

**Figure S18** Transport and magnetoresistance curves of Ta-0.9 single crystal.

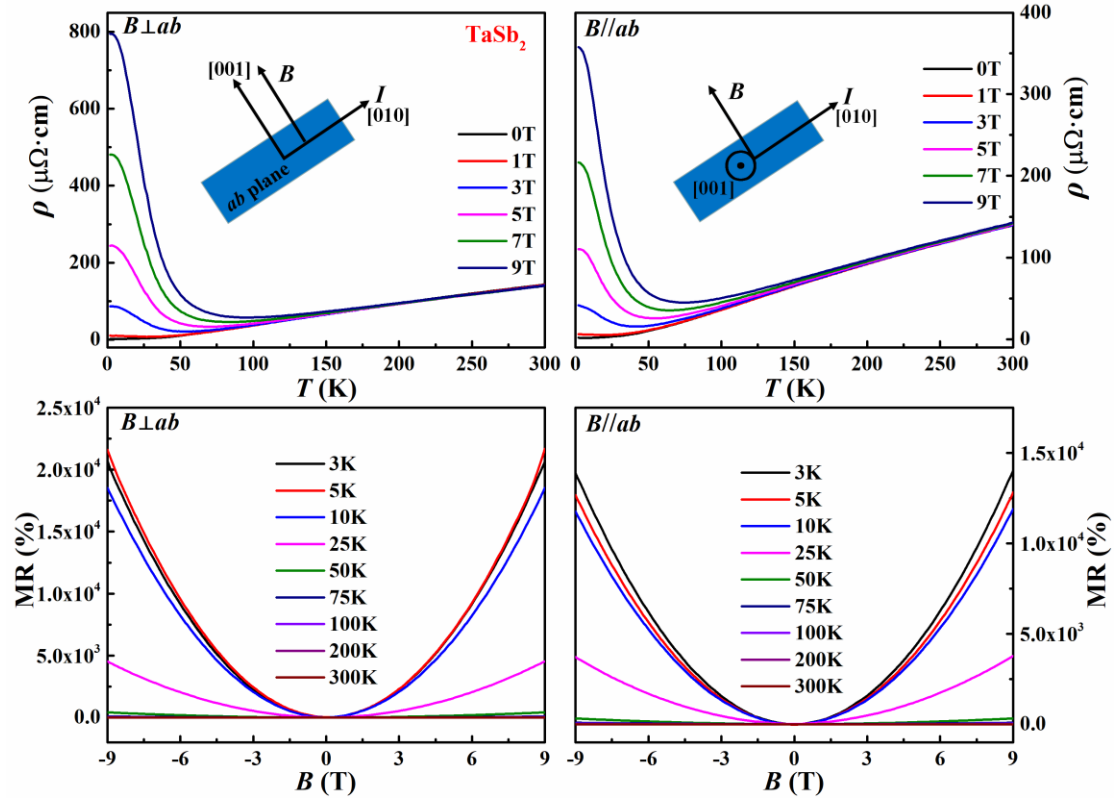

**Figure S19** Transport and magnetoresistance curves of Ta-1 single crystal.
